# Supplementary material for: Potential contribution of vaccination uptake to occupational differences in risk of SARS-CoV-2: analysis of the ONS COVID-19 Infection Survey
Source: HighWire-hosted journal article supplement (doi:10.1136/oemed-2023-108931), 2023-12-12
Supplement: oemed-2023-108931supp001_data_supplement.pdf [file oemed-2023-108931supp001_data_supplement.pdf]

## Supplementary Tables

---

| SOC20 |                                                                    |                                |
|-------|--------------------------------------------------------------------|--------------------------------|
| 10    | NEW OCCUPATIONAL GROUPINGS                                         | Occ_subgroups                  |
| 1115  | Chief executives and senior officials                              | other workers-office based     |
| 1116  | Elected officers and representatives                               | other workers-office based     |
| 1121  | Production managers and directors in manufacturing                 | other workers-office based     |
| 1122  | Production managers and directors in construction                  | other workers-office based     |
| 1123  | Production managers and directors in mining and energy             | other workers-office based     |
| 1131  | Financial managers and directors                                   | other workers-office based     |
| 1132  | Marketing and sales directors                                      | other workers-office based     |
| 1133  | Purchasing managers and directors                                  | other workers-office based     |
| 1134  | Advertising and public relations directors                         | other workers-office based     |
| 1135  | Human resource managers and directors                              | other workers-office based     |
| 1136  | Information technology and telecommunications directors            | other workers-office based     |
| 1139  | Functional managers and directors n.e.c.                           | other workers-office based     |
| 1150  | Financial institution managers and directors                       | other workers-office based     |
| 1161  | Managers and directors in transport and distribution               | other workers-office based     |
| 1162  | Managers and directors in storage and warehousing                  | other workers-office based     |
| 1171  | Officers in armed forces                                           | police and protective services |
| 1172  | Senior police officers                                             | police and protective services |
| 1173  | Senior officers in fire, ambulance, prison and related services    | police and protective services |
| 1181  | Health services and public health managers and directors           | healthcare-office based        |
| 1184  | Social services managers and directors                             | social care                    |
| 1190  | Managers and directors in retail and wholesale                     | retail                         |
| 1211  | Managers and proprietors in agriculture and horticulture           | other workers-non-office based |
| 1213  | Managers and proprietors in forestry, fishing and related services | other workers-non-office based |
| 1221  | Hotel and accommodation managers and proprietors                   | hospitality                    |
| 1223  | Restaurant and catering establishment managers and proprietors     | hospitality                    |
| 1224  | Publicans and managers of licensed premises                        | hospitality                    |
| 1225  | Leisure and sports managers                                        | other workers-office based     |
| 1226  | Travel agency managers and proprietors                             | other workers-office based     |
| 1241  | Health care practice managers                                      | healthcare-office based        |
| 1242  | Residential, day and domiciliary care managers and proprietors     | social care                    |
| 1251  | Property, housing and estate managers                              | other workers-non-office based |

---

---

|      |                                                                    |                                |
|------|--------------------------------------------------------------------|--------------------------------|
| 1252 | Garage managers and proprietors                                    | other workers-non-office based |
| 1253 | Hairdressing and beauty salon managers and proprietors             | personal care                  |
| 1254 | Shopkeepers and proprietors – wholesale and retail                 | retail                         |
| 1255 | Waste disposal and environmental services managers                 | sanitation services            |
| 1259 | Managers and proprietors in other services n.e.c.                  | other workers-office based     |
| 2111 | Chemical scientists                                                | other workers-non-office based |
| 2112 | Biological scientists and biochemists                              | other workers-non-office based |
| 2113 | Physical scientists                                                | other workers-non-office based |
| 2114 | Social and humanities scientists                                   | other workers-non-office based |
| 2119 | Natural and social science professionals n.e.c.                    | other workers-office based     |
| 2121 | Civil engineers                                                    | other workers-non-office based |
| 2122 | Mechanical engineers                                               | other workers-non-office based |
| 2123 | Electrical engineers                                               | other workers-non-office based |
| 2124 | Electronics engineers                                              | other workers-non-office based |
| 2126 | Design and development engineers                                   | other workers-non-office based |
| 2127 | Production and process engineers                                   | other workers-non-office based |
| 2129 | Engineering professionals n.e.c.                                   | other workers-non-office based |
| 2133 | IT specialist managers                                             | other workers-office based     |
| 2134 | IT project and programme managers                                  | other workers-office based     |
| 2135 | IT business analysts, architects and systems designers             | other workers-office based     |
| 2136 | Programmers and software development professionals                 | other workers-office based     |
| 2137 | Web design and development professionals                           | other workers-office based     |
| 2139 | Information technology and telecommunications professionals n.e.c. | other workers-office based     |
| 2141 | Conservation professionals                                         | other workers-non-office based |
| 2142 | Environment professionals                                          | other workers-non-office based |
| 2150 | Air traffic controllers                                            | other workers-office based     |
| 2211 | Medical practitioners                                              | healthcare-patient contact     |
| 2212 | Psychologists                                                      | healthcare-patient contact     |
| 2213 | Pharmacists                                                        | healthcare-patient contact     |
| 2214 | Ophthalmic opticians                                               | healthcare-patient contact     |
| 2215 | Dental practitioners                                               | healthcare-patient contact     |
| 2216 | Veterinarians                                                      | other workers-non-office based |
| 2217 | Medical radiographers                                              | healthcare-patient contact     |

---

---

|      |                                                            |                                |
|------|------------------------------------------------------------|--------------------------------|
| 2218 | Podiatrists                                                | healthcare-patient contact     |
| 2219 | Health professionals n.e.c.                                | healthcare-patient contact     |
| 2221 | Physiotherapists                                           | healthcare-patient contact     |
| 2222 | Occupational therapists                                    | healthcare-patient contact     |
| 2223 | Speech and language therapists                             | healthcare-patient contact     |
| 2229 | Therapy professionals n.e.c.                               | healthcare-patient contact     |
| 2231 | Nurses                                                     | healthcare-patient contact     |
| 2232 | Midwives                                                   | healthcare-patient contact     |
| 2311 | Higher education teaching professionals                    | education                      |
| 2312 | Further education teaching professionals                   | education                      |
| 2314 | Secondary education teaching professionals                 | education                      |
| 2315 | Primary and nursery education teaching professionals       | education                      |
| 2316 | Special needs education teaching professionals             | education                      |
| 2317 | Senior professionals of educational establishments         | education                      |
| 2318 | Education advisers and school inspectors                   | education                      |
| 2319 | Teaching and other educational professionals n.e.c.        | education                      |
| 2412 | Barristers and judges                                      | other workers-office based     |
| 2413 | Solicitors                                                 | other workers-office based     |
| 2419 | Legal professionals n.e.c.                                 | other workers-office based     |
| 2421 | Chartered and certified accountants                        | other workers-office based     |
| 2423 | Management consultants and business analysts               | other workers-office based     |
| 2424 | Business and financial project management professionals    | other workers-office based     |
| 2425 | Actuaries, economists and statisticians                    | other workers-office based     |
| 2426 | Business and related research professionals                | other workers-office based     |
| 2429 | Business, research and administrative professionals n.e.c. | other workers-office based     |
| 2431 | Architects                                                 | other workers-office based     |
| 2432 | Town planning officers                                     | other workers-office based     |
| 2433 | Quantity surveyors                                         | other workers-office based     |
| 2434 | Chartered surveyors                                        | other workers-office based     |
| 2435 | Chartered architectural technologists                      | other workers-office based     |
| 2436 | Construction project managers and related professionals    | other workers-non-office based |
| 2442 | Social workers                                             | social care                    |
| 2443 | Probation officers                                         | social care                    |
| 2444 | Clergy                                                     | social care                    |
| 2449 | Welfare professionals n.e.c.                               | social care                    |
| 2451 | Librarians                                                 | other workers-office based     |
| 2452 | Archivists and curators                                    | other workers-office based     |
| 2461 | Quality control and planning engineers                     | other workers-non-office based |
| 2462 | Quality assurance and regulatory professionals             | other workers-office based     |
| 2463 | Environmental health professionals                         | other workers-non-office based |
| 2471 | Journalists, newspaper and periodical editors              | other workers-office based     |
| 2472 | Public relations professionals                             | other workers-office based     |
| 2473 | Advertising accounts managers and creative directors       | other workers-office based     |

---

---

|      |                                                        |                                |
|------|--------------------------------------------------------|--------------------------------|
| 3111 | Laboratory technicians                                 | other workers-non-office based |
| 3112 | Electrical and electronics technicians                 | other workers-non-office based |
| 3113 | Engineering technicians                                | other workers-non-office based |
| 3114 | Building and civil engineering technicians             | other workers-non-office based |
| 3115 | Quality assurance technicians                          | other workers-non-office based |
| 3116 | Planning, process and production technicians           | other workers-non-office based |
| 3119 | Science, engineering and production technicians n.e.c. | other workers-non-office based |
| 3121 | Architectural and town planning technicians            | other workers-non-office based |
| 3122 | Draughtspersons                                        | other workers-non-office based |
| 3131 | IT operations technicians                              | other workers-office based     |
| 3132 | IT user support technicians                            | other workers-office based     |
| 3213 | Paramedics                                             | healthcare-patient contact     |
| 3216 | Dispensing opticians                                   | healthcare-patient contact     |
| 3217 | Pharmaceutical technicians                             | healthcare-patient contact     |
| 3218 | Medical and dental technicians                         | healthcare-patient contact     |
| 3219 | Health associate professionals n.e.c.                  | healthcare-patient contact     |
| 3231 | Youth and community workers                            | social care                    |
| 3233 | Child and early years officers                         | social care                    |
| 3234 | Housing officers                                       | social care                    |
| 3235 | Counsellors                                            | social care                    |
| 3239 | Welfare and housing associate professionals n.e.c.     | social care                    |
| 3311 | NCOs and other ranks                                   | police and protective services |
| 3312 | Police officers (sergeant and below)                   | police and protective services |
| 3313 | Fire service officers (watch manager and below)        | police and protective services |
| 3314 | Prison service officers (below principal officer)      | police and protective services |
| 3315 | Police community support officers                      | police and protective services |
| 3319 | Protective service associate professionals n.e.c.      | police and protective services |
| 3411 | Artists                                                | other workers-office based     |
| 3412 | Authors, writers and translators                       | other workers-office based     |
| 3413 | Actors, entertainers and presenters                    | other workers-non-office based |
| 3414 | Dancers and choreographers                             | other workers-non-office based |
| 3415 | Musicians                                              | other workers-non-office based |

---

---

|      |                                                                  |                                |
|------|------------------------------------------------------------------|--------------------------------|
| 3416 | Arts officers, producers and directors                           | other workers-non-office based |
| 3417 | Photographers, audio-visual and broadcasting equipment operators | other workers-non-office based |
| 3421 | Graphic designers                                                | other workers-office based     |
| 3422 | Product, clothing and related designers                          | other workers-office based     |
| 3441 | Sports players                                                   | other workers-non-office based |
| 3442 | Sports coaches, instructors and officials                        | other workers-non-office based |
| 3443 | Fitness instructors                                              | other workers-non-office based |
| 3511 | Air traffic controllers                                          | other workers-office based     |
| 3512 | Aircraft pilots and flight engineers                             | transport-public facing        |
| 3513 | Ship and hovercraft officers                                     | transport-nonpublic facing     |
| 3520 | Legal associate professionals                                    | other workers-office based     |
| 3531 | Estimators, valuers and assessors                                | other workers-office based     |
| 3532 | Brokers                                                          | other workers-office based     |
| 3533 | Insurance underwriters                                           | other workers-office based     |
| 3534 | Finance and investment analysts and advisers                     | other workers-office based     |
| 3535 | Taxation experts                                                 | other workers-office based     |
| 3536 | Importers and exporters                                          | other workers-office based     |
| 3537 | Financial and accounting technicians                             | other workers-office based     |
| 3538 | Financial accounts managers                                      | other workers-office based     |
| 3539 | Business and related associate professionals n.e.c.              | other workers-office based     |
| 3541 | Buyers and procurement officers                                  | other workers-office based     |
| 3542 | Business sales executives                                        | other workers-office based     |
| 3543 | Marketing associate professionals                                | other workers-office based     |
| 3544 | Estate agents and auctioneers                                    | other workers-office based     |
| 3545 | Sales accounts and business development managers                 | other workers-office based     |
| 3546 | Conference and exhibition managers and organisers                | other workers-office based     |
| 3550 | Conservation and environmental associate professionals           | other workers-non-office based |
| 3561 | Public services associate professionals                          | other workers-office based     |
| 3562 | Human resources and industrial relations officers                | other workers-office based     |
| 3563 | Vocational and industrial trainers and instructors               | other workers-office based     |
| 3564 | Careers advisers and vocational guidance specialists             | other workers-office based     |
| 3565 | Inspectors of standards and regulations                          | other workers-non-office based |
| 3567 | Health and safety officers                                       | other workers-non-office based |
| 4112 | National government administrative occupations                   | other workers-office based     |
| 4113 | Local government administrative occupations                      | other workers-office based     |
| 4114 | Officers of non-governmental organisations                       | other workers-office based     |
| 4121 | Credit controllers                                               | other workers-office based     |
| 4122 | Book-keepers, payroll managers and wages clerks                  | other workers-office based     |
| 4123 | Bank and post office clerks                                      | other workers-office based     |
| 4124 | Finance officers                                                 | other workers-office based     |

---

---

|      |                                                  |                                |
|------|--------------------------------------------------|--------------------------------|
| 4129 | Financial administrative occupations n.e.c.      | other workers-office based     |
| 4131 | Records clerks and assistants                    | other workers-office based     |
| 4132 | Pensions and insurance clerks and assistants     | other workers-office based     |
| 4133 | Stock control clerks and assistants              | retail                         |
| 4134 | Transport and distribution clerks and assistants | transport-nonpublic facing     |
| 4135 | Library clerks and assistants                    | other workers-office based     |
| 4138 | Human resources administrative occupations       | other workers-office based     |
| 4151 | Sales administrators                             | retail                         |
| 4159 | Other administrative occupations n.e.c.          | other workers-office based     |
| 4161 | Office managers                                  | other workers-office based     |
| 4162 | Office supervisors                               | other workers-office based     |
| 4211 | Medical secretaries                              | healthcare-office based        |
| 4212 | Legal secretaries                                | other workers-office based     |
| 4213 | School secretaries                               | education                      |
| 4214 | Company secretaries                              | other workers-office based     |
| 4215 | Personal assistants and other secretaries        | other workers-office based     |
| 4216 | Receptionists                                    | other workers-office based     |
| 4217 | Typists and related keyboard occupations         | other workers-office based     |
| 5111 | Farmers                                          | manual                         |
| 5112 | Horticultural trades                             | manual                         |
| 5113 | Gardeners and landscape gardeners                | manual                         |
| 5114 | Groundsmen and greenkeepers                      | manual                         |
| 5119 | Agricultural and fishing trades n.e.c.           | manual                         |
| 5211 | Smiths and forge workers                         | manual                         |
| 5212 | Moulders, core makers and die casters            | manual                         |
| 5213 | Sheet metal workers                              | manual                         |
| 5214 | Metal plate workers, and riveters                | manual                         |
| 5215 | Welding trades                                   | manual                         |
| 5216 | Pipe fitters                                     | manual                         |
| 5221 | Metal machining setters and setter-operators     | manual                         |
| 5222 | Tool makers, tool fitters and markers-out        | manual                         |
| 5223 | Metal working production and maintenance fitters | manual                         |
| 5224 | Precision instrument makers and repairers        | manual                         |
| 5225 | Air-conditioning and refrigeration engineers     | manual                         |
| 5231 | Vehicle technicians, mechanics and electricians  | manual                         |
| 5232 | Vehicle body builders and repairers              | manual                         |
| 5234 | Vehicle paint technicians                        | manual                         |
| 5235 | Aircraft maintenance and related trades          | manual                         |
| 5236 | Boat and ship builders and repairers             | manual                         |
| 5237 | Rail and rolling stock builders and repairers    | manual                         |
| 5241 | Electricians and electrical fitters              | other workers-non-office based |
| 5242 | Telecommunications engineers                     | other workers-non-office based |
| 5244 | TV, video and audio engineers                    | other workers-non-office based |

---

---

|      |                                                             |                                |
|------|-------------------------------------------------------------|--------------------------------|
| 5245 | IT engineers                                                | other workers-non-office based |
| 5249 | Electrical and electronic trades n.e.c.                     | other workers-non-office based |
| 5250 | Skilled metal, electrical and electronic trades supervisors | manual                         |
| 5311 | Steel erectors                                              | manual                         |
| 5312 | Bricklayers and masons                                      | manual                         |
| 5313 | Roofers, roof tilers and slaters                            | manual                         |
| 5314 | Plumbers and heating and ventilating engineers              | manual                         |
| 5315 | Carpenters and joiners                                      | manual                         |
| 5316 | Glaziers, window fabricators and fitters                    | manual                         |
| 5319 | Construction and building trades n.e.c.                     | manual                         |
| 5321 | Plasterers                                                  | manual                         |
| 5322 | Floorers and wall tilers                                    | manual                         |
| 5323 | Painters and decorators                                     | manual                         |
| 5330 | Construction and building trades supervisors                | manual                         |
| 5411 | Weavers and knitters                                        | manual                         |
| 5412 | Upholsterers                                                | manual                         |
| 5413 | Footwear and leather working trades                         | manual                         |
| 5414 | Tailors and dressmakers                                     | manual                         |
| 5419 | Textiles, garments and related trades n.e.c.                | manual                         |
| 5421 | Pre-press technicians                                       | manual                         |
| 5422 | Printers                                                    | manual                         |
| 5423 | Print finishing and binding workers                         | manual                         |
| 5431 | Butchers                                                    | food processing                |
| 5432 | Bakers and flour confectioners                              | food processing                |
| 5433 | Fishmongers and poultry dressers                            | food processing                |
| 5434 | Chefs                                                       | hospitality                    |
| 5435 | Cooks                                                       | hospitality                    |
| 5436 | Catering and bar managers                                   | hospitality                    |
| 5441 | Glass and ceramics makers, decorators and finishers         | manual                         |
| 5442 | Furniture makers and other craft woodworkers                | manual                         |
| 5443 | Florists                                                    | retail                         |
| 5449 | Other skilled trades n.e.c.                                 | manual                         |
| 6121 | Nursery nurses and assistants                               | education                      |
| 6122 | Childminders and related occupations                        | education                      |
| 6123 | Playworkers                                                 | education                      |
| 6125 | Teaching assistants                                         | education                      |
| 6126 | Educational support assistants                              | education                      |
| 6131 | Veterinary nurses                                           | other workers-non-office based |
| 6132 | Pest control officers                                       | sanitation services            |
| 6139 | Animal care services occupations n.e.c.                     | other workers-non-office based |
| 6141 | Nursing auxiliaries and assistants                          | healthcare-patient contact     |
| 6142 | Ambulance staff (excluding paramedics)                      | healthcare-patient contact     |
| 6143 | Dental nurses                                               | healthcare-patient contact     |

---

---

|      |                                                    |                                |
|------|----------------------------------------------------|--------------------------------|
| 6144 | Houseparents and residential wardens               | social care                    |
| 6145 | Care workers and home carers                       | social care                    |
| 6146 | Senior care workers                                | social care                    |
| 6147 | Care escorts                                       | social care                    |
| 6148 | Undertakers, mortuary and crematorium assistants   | social care                    |
| 6211 | Sports and leisure assistants                      | other workers-non-office based |
| 6212 | Travel agents                                      | other workers-office based     |
| 6214 | Air travel assistants                              | transport-public facing        |
| 6215 | Rail travel assistants                             | transport-public facing        |
| 6219 | Leisure and travel service occupations n.e.c.      | transport-public facing        |
| 6221 | Hairdressers and barbers                           | personal care                  |
| 6222 | Beauticians and related occupations                | personal care                  |
| 6231 | Housekeepers and related occupations               | hospitality                    |
| 6232 | Caretakers                                         | hospitality                    |
| 6240 | Cleaning and housekeeping managers and supervisors | hospitality                    |
| 7111 | Sales and retail assistants                        | retail                         |
| 7112 | Retail cashiers and check-out operators            | retail                         |
| 7113 | Telephone salespersons                             | other workers-office based     |
| 7114 | Pharmacy and other dispensing assistants           | healthcare-patient contact     |
| 7115 | Vehicle and parts salespersons and advisers        | retail                         |
| 7121 | Collector salespersons and credit agents           | other workers-office based     |
| 7122 | Debt, rent and other cash collectors               | other workers-office based     |
| 7123 | Roundspersons and van salespersons                 | other workers-non-office based |
| 7124 | Market and street traders and assistants           | retail                         |
| 7125 | Merchandisers and window dressers                  | other workers-non-office based |
| 7129 | Sales related occupations n.e.c.                   | retail                         |
| 7130 | Sales supervisors                                  | retail                         |
| 7211 | Call and contact centre occupations                | other workers-office based     |
| 7213 | Telephonists                                       | other workers-office based     |
| 7214 | Communication operators                            | other workers-office based     |
| 7215 | Market research interviewers                       | other workers-office based     |
| 7219 | Customer service occupations n.e.c.                | other workers-office based     |
| 7220 | Customer service managers and supervisors          | other workers-office based     |
| 8111 | Food, drink and tobacco process operatives         | food processing                |
| 8112 | Glass and ceramics process operatives              | manual                         |
| 8113 | Textile process operatives                         | manual                         |
| 8114 | Chemical and related process operatives            | manual                         |
| 8115 | Rubber process operatives                          | manual                         |
| 8116 | Plastics process operatives                        | manual                         |
| 8117 | Metal making and treating process operatives       | manual                         |
| 8118 | Electroplaters                                     | manual                         |
| 8119 | Process operatives n.e.c.                          | manual                         |
| 8121 | Paper and wood machine operatives                  | manual                         |
| 8122 | Coal mine operatives                               | manual                         |

---



---

|      |                                                             |                                |
|------|-------------------------------------------------------------|--------------------------------|
| 8123 | Quarry workers and related operatives                       | manual                         |
| 8124 | Energy plant operatives                                     | manual                         |
| 8125 | Metal working machine operatives                            | manual                         |
| 8126 | Water and sewerage plant operatives                         | manual                         |
| 8127 | Printing machine assistants                                 | manual                         |
| 8129 | Plant and machine operatives n.e.c.                         | manual                         |
| 8131 | Assemblers (electrical and electronic products)             | manual                         |
| 8132 | Assemblers (vehicles and metal goods)                       | manual                         |
| 8133 | Routine inspectors and testers                              | manual                         |
| 8134 | Weighers, graders and sorters                               | manual                         |
| 8135 | Tyre, exhaust and windscreen fitters                        | manual                         |
| 8137 | Sewing machinists                                           | manual                         |
| 8139 | Assemblers and routine operatives n.e.c.                    | manual                         |
| 8141 | Scaffolders, staggers and riggers                           | manual                         |
| 8142 | Road construction operatives                                | manual                         |
| 8143 | Rail construction and maintenance operatives                | manual                         |
| 8149 | Construction operatives n.e.c.                              | manual                         |
| 8211 | Large goods vehicle drivers                                 | transport-nonpublic facing     |
| 8212 | Van drivers                                                 | transport-nonpublic facing     |
| 8213 | Bus and coach drivers                                       | transport-public facing        |
| 8214 | Taxi and cab drivers and chauffeurs                         | transport-public facing        |
| 8215 | Driving instructors                                         | transport-public facing        |
| 8221 | Crane drivers                                               | other workers-non-office based |
| 8222 | Fork-lift truck drivers                                     | other workers-non-office based |
| 8223 | Agricultural machinery drivers                              | other workers-non-office based |
| 8229 | Mobile machine drivers and operatives n.e.c.                | other workers-non-office based |
| 8231 | Train and tram drivers                                      | transport-nonpublic facing     |
| 8232 | Marine and waterways transport operatives                   | transport-nonpublic facing     |
| 8233 | Air transport operatives                                    | transport-nonpublic facing     |
| 8234 | Rail transport operatives                                   | transport-nonpublic facing     |
| 8239 | Other drivers and transport operatives n.e.c.               | transport-nonpublic facing     |
| 9111 | Farm workers                                                | manual                         |
| 9112 | Forestry workers                                            | manual                         |
| 9119 | Fishing and other elementary agriculture occupations n.e.c. | manual                         |
| 9120 | Elementary construction occupations                         | manual                         |
| 9132 | Industrial cleaning process occupations                     | sanitation services            |
| 9134 | Packers, bottlers, canners and fillers                      | manual                         |
| 9139 | Elementary process plant occupations n.e.c.                 | manual                         |
| 9211 | Postal workers, mail sorters, messengers and couriers       | transport-nonpublic facing     |
| 9219 | Elementary administration occupations n.e.c.                | other workers-office based     |
| 9231 | Window cleaners                                             | sanitation services            |
| 9232 | Street cleaners                                             | sanitation services            |

---

---

|      |                                               |                                |
|------|-----------------------------------------------|--------------------------------|
| 9233 | Cleaners and domestics                        | sanitation services            |
| 9234 | Launderers, dry cleaners and pressers         | sanitation services            |
| 9235 | Refuse and salvage occupations                | sanitation services            |
| 9236 | Vehicle valeters and cleaners                 | sanitation services            |
| 9239 | Elementary cleaning occupations n.e.c.        | sanitation services            |
| 9241 | Security guards and related occupations       | police and protective services |
| 9242 | Parking and civil enforcement occupations     | police and protective services |
| 9244 | School midday and crossing patrol occupations | other workers-non-office based |
| 9249 | Elementary security occupations n.e.c.        | police and protective services |
| 9251 | Shelf fillers                                 | retail                         |
| 9259 | Elementary sales occupations n.e.c.           | retail                         |
| 9260 | Elementary storage occupations                | manual                         |
| 9271 | Hospital porters                              | healthcare-patient contact     |
| 9272 | Kitchen and catering assistants               | food processing                |
| 9273 | Waiters and waitresses                        | hospitality                    |
| 9274 | Bar staff                                     | hospitality                    |
| 9275 | Leisure and theme park attendants             | hospitality                    |
| 9279 | Other elementary services occupations n.e.c.  | hospitality                    |

---

**Supplementary Table 1: Occupational groupings used in the analysis.**

| Occupation                     | Moderna | Oxford/AstraZenica | Pfizer/BioNTech | Other | Missing |
|--------------------------------|---------|--------------------|-----------------|-------|---------|
| Education                      | 329     | 7,827              | 3,709           | *     | *       |
| %                              | 3       | 66                 | 31              | *     | *       |
| Food processing                | 40      | 618                | 383             | *     | *       |
| %                              | 3.84    | 59.25              | 36.72           | *     | *       |
| Healthcare-office based        | *       | 251                | 511             | *     | *       |
| %                              | *       | 33                 | 66              | *     | *       |
| Healthcare-patient contact     | 54      | 2,787              | 7,950           | 28    | 27      |
| %                              | 0.5     | 26                 | 73              | 0.26  | 0.25    |
| Hospitality                    | 91      | 1,354              | 932             | *     | *       |
| %                              | 4       | 57                 | 39              | *     | *       |
| Manual                         | 329     | 6,311              | 3,379           | *     | *       |
| %                              | 3       | 63                 | 34              | *     | *       |
| Other workers-non-office-based | 449     | 6,158              | 4,417           | 31    | 10      |
| %                              | 4       | 56                 | 40              | 0.28  | 0.09    |
| Other workers-office-based     | 3,028   | 39,654             | 25,953          | 170   | 63      |
| %                              | 4.4     | 57.58              | 37.69           | 0.25  | 0.09    |
| Personal care                  | 22      | 408                | 267             | *     | *       |
| %                              | 3.14    | 58                 | 38              | *     | *       |
| Police and protective          | 81      | 1,975              | 952             | *     | *       |
| %                              | 2.69    | 66                 | 32              | *     | *       |
| Retail                         | 182     | 3,346              | 2,154           | *     | *       |
| %                              | 3.19    | 59                 | 38              | *     | *       |
| Sanitation services            | 29      | 1,030              | 493             | *     | *       |
| %                              | 1.86    | 66                 | 32              | *     | *       |
| Social care                    | 70      | 2,949              | 3,362           | *     | *       |
| %                              | 1.1     | 46                 | 53              | *     | *       |
| Transport-nonpublic facing     | 77      | 1,946              | 846             | *     | *       |
| %                              | 2.68    | 68                 | 29              | *     | *       |
| Transport-public facing        | 22      | 728                | 313             | *     | *       |
| %                              | 2       | 68                 | 29              | *     | *       |
| Not working/ student           | 1,417   | 39,087             | 22,170          | 140   | 77      |
| %                              | 2       | 62                 | 35              | 0.22  | 0.12    |
| Missing                        | *       | 27,963             | 19,026          | 118   | *       |
| %                              | *       | 57                 | 39              | 0.24  | *       |

**Supplementary Table 2: Vaccine type for those receiving a first dose, by occupational group. Due to disclosure rules, counts below 10 are redacted. Values are also redacted where revealing the value would indirectly disclose a count below 10 by subtraction.**

| Occupation                     | Moderna | Oxford/AstraZenica | Pfizer/BioNTech | Other | Missing |
|--------------------------------|---------|--------------------|-----------------|-------|---------|
| Education                      | 325     | 7,798              | 3,679           | 11    | 11      |
| %                              | 3       | 66                 | 31              | 0.09  | 0.09    |
| Food processing                | 39      | 614                | 374             | *     | *       |
| %                              | 3.79    | 59.73              | 36.38           | *     | *       |
| Healthcare-office based        | *       | 249                | 509             | *     | *       |
| %                              | *       | 33                 | 66              | *     | *       |
| Healthcare-patient contact     | 53      | 2,756              | 7,905           | 22    | 35      |
| %                              | 0.49    | 26                 | 73              | 0.2   | 0.32    |
| Hospitality                    | 85      | 1,350              | 913             | *     | *       |
| %                              | 4       | 57                 | 39              | *     | *       |
| Manual                         | 324     | 6,283              | 3,292           | *     | *       |
| %                              | 3       | 63                 | 33              | *     | *       |
| Other workers-non-office-based | 441     | 6,135              | 4,356           | 24    | 14      |
| %                              | 4       | 56                 | 40              | 0.22  | 0.13    |
| Other workers-office-based     | 2,984   | 39,543             | 25,648          | 110   | 124     |
| %                              | 4.36    | 57.8               | 37.49           | 0.16  | 0.18    |
| Personal care                  | 22      | 404                | 262             | *     | *       |
| %                              | 3.18    | 58                 | 38              | *     | *       |
| Police and protective          | 76      | 1,965              | 943             | *     | *       |
| %                              | 2.54    | 66                 | 32              | *     | *       |
| Retail                         | 180     | 3,327              | 2,118           | *     | *       |
| %                              | 3.19    | 59                 | 38              | *     | *       |
| Sanitation services            | 30      | 1,023              | 482             | *     | *       |
| %                              | 1.95    | 66                 | 31              | *     | *       |
| Social care                    | 69      | 2,931              | 3,334           | *     | *       |
| %                              | 1.09    | 46                 | 53              | *     | *       |
| Transport-nonpublic facing     | 75      | 1,938              | 832             | *     | *       |
| %                              | 2.63    | 68                 | 29              | *     | *       |
| Transport-public facing        | 19      | 726                | 308             | *     | *       |
| %                              | 2       | 69                 | 29              | *     | *       |
| Not working/ student           | 1,372   | 38,738             | 21,671          | 97    | 139     |
| %                              | 2       | 62                 | 35              | 0.16  | 0.22    |
| Missing                        | *       | 27,848             | 18,733          | 81    | *       |
| %                              | *       | 57                 | 39              | 0.17  | *       |

**Supplementary Table 3: Vaccine type for those receiving a second dose, by occupational group. Due to disclosure rules, values are redacted when counts are below 10. Values are also redacted where revealing the value would indirectly disclose a count below 10 by subtraction.**

| Occupation                     | Moderna | Oxford/AstraZenica | Pfizer/BioNTech | Other |
|--------------------------------|---------|--------------------|-----------------|-------|
| Education                      | 3,460   | *                  | 7,528           | *     |
| %                              | 31      | *                  | 68              | *     |
| Food processing                | 260     | *                  | 600             | *     |
| %                              | 30.23   | *                  | 69.77           | *     |
| Healthcare-office based        | 82      | *                  | 658             | *     |
| %                              | 11.08   | *                  | 89              | *     |
| Healthcare-patient contact     | 829     | *                  | 9,225           | *     |
| %                              | 8.23    | *                  | 92              | *     |
| Hospitality                    | 597     | *                  | 1,418           | *     |
| %                              | 30      | *                  | 70              | *     |
| Manual                         | 2,833   | *                  | 5,812           | *     |
| %                              | 33      | *                  | 67              | *     |
| Other workers-non-office-based | 3,283   | *                  | 6,672           | *     |
| %                              | 33      | *                  | 67              | *     |
| Other workers-office-based     | 20,677  | 51                 | 42,692          | 15    |
| %                              | 32.6    | 0.08               | 67.3            | 0.02  |
| Personal care                  | 176     | *                  | 409             | *     |
| %                              | 30.03   | *                  | 70              | *     |
| Police and protective          | 912     | *                  | 1,776           | *     |
| %                              | 33.9    | *                  | 66              | *     |
| Retail                         | 1,575   | *                  | 3,380           | *     |
| %                              | 31.74   | *                  | 68              | *     |
| Sanitation services            | 380     | *                  | 987             | *     |
| %                              | 27.78   | *                  | 72              | *     |
| Social care                    | 1,025   | *                  | 4,767           | *     |
| %                              | 17.68   | *                  | 82              | *     |
| Transport-nonpublic facing     | 846     | *                  | 1,697           | *     |
| %                              | 33.27   | *                  | 67              | *     |
| Transport-public facing        | 274     | *                  | 672             | *     |
| %                              | 29      | *                  | 71              | *     |
| Not working/ student           | 15,073  | 104                | 41,211          | 18    |
| %                              | 27      | 0                  | 73              | 0.03  |
| Missing                        | 13,708  | 45                 | 30,710          | 15    |
| %                              | 31      | 0                  | 69              | 0.03  |

**Supplementary Table 4: Vaccine type for those receiving a third dose, by occupational group. Due to disclosure rules, values are redacted when counts are below 10. Values are also redacted where revealing the value would indirectly disclose a count below 10 by subtraction.**

| Number of vaccines received | Hazard Ratio (95% CI)  |
|-----------------------------|------------------------|
| 0                           | Ref                    |
| 1                           | 0.80<br>(0.76 to 0.85) |
| 2                           | 0.71<br>(0.68 to 0.75) |
| 3                           | 0.40<br>(0.38 to 0.41) |

**Supplementary Table 5: Hazard ratios (95% CIs) for number of vaccines received in relation to infection with SARS-CoV-2. Based on n = 256,598 individuals. Adjusted for occupation, age, sex, ethnicity, deprivation, region, urban or rural area, household size, and presence of pre-existing health conditions.**

| Occupation                     | Number of infections |        |      |   |
|--------------------------------|----------------------|--------|------|---|
|                                | 0                    | 1      | 2    | 3 |
| Education                      | 8,846                | 3,209  | 76   | 0 |
|                                | 72.92                | 26.45  | 0.63 | 0 |
| Food processing                | 830                  | 246    | *    | * |
|                                | 76.85                | 22.78  | *    | * |
| Healthcare-office based        | 612                  | 162    | *    | * |
|                                | 78.76                | 20.85  | *    | * |
| Healthcare-patient contact     | 8,544                | 2,379  | 47   | 0 |
|                                | 77.89                | 21.69  | 0.43 | 0 |
| Hospitality                    | 1,919                | 528    | 15   | 0 |
|                                | 77.94                | 21.45  | 0.61 | 0 |
| Manual                         | 8,080                | 2,265  | 42   | 0 |
|                                | 77.79                | 21.81  | 0.4  | 0 |
| Other workers-non-office-based | 8,892                | 2,403  | 56   | 0 |
|                                | 78.34                | 21.17  | 0.49 | 0 |
| Other workers-office-based     | 54,857               | 15,027 | *    | * |
|                                | 78.13                | 21.4   | *    | * |
| Personal care                  | 539                  | 189    | *    | * |
|                                | 73.63                | 25.82  | *    | * |
| Police and protective          | 2,327                | 733    | 16   | 0 |
|                                | 75.65                | 23.83  | 0.52 | 0 |
| Retail                         | 4,598                | 1,257  | 20   | 0 |
|                                | 78.26                | 21.4   | 0.34 | 0 |
| Sanitation services            | 1,245                | 357    | *    | * |
|                                | 77.33                | 22.17  | *    | * |
| Social care                    | 5,007                | 1,481  | 45   | 0 |
|                                | 76.64                | 22.67  | 0.69 | 0 |
| Transport-nonpublic facing     | 2,318                | 655    | 17   | 0 |
|                                | 77.53                | 21.91  | 0.57 | 0 |
| Transport-public facing        | 833                  | 246    | *    | * |
|                                | 76.56                | 22.61  | *    | * |
| Not working/student            | 52,214               | 12,749 | *    | * |
|                                | 80.04                | 19.54  | *    | * |
| Missing/incomplete             | 38,479               | 11,335 | 276  | 0 |
|                                | 76.82                | 22.63  | 0.55 | 0 |

**Supplementary Table 6: Number of infections by occupational group. Due to disclosure rules, values are redacted when counts are below 10. Values are also redacted where revealing the value would indirectly disclose a count below 10 by subtraction.**

|                                | Model 1                | Model 2                | Model 3                |
|--------------------------------|------------------------|------------------------|------------------------|
| Education                      | 1.272<br>[1.226,1.320] | 1.252<br>[1.207,1.299] | 1.250<br>[1.204,1.297] |
| Food processing                | 1.049<br>[0.931,1.181] | 1.041<br>[0.924,1.173] | 0.984<br>[0.874,1.109] |
| Healthcare-office based        | 0.901<br>[0.775,1.049] | 0.906<br>[0.778,1.054] | 0.950<br>[0.816,1.105] |
| Healthcare-patient contact     | 1.016<br>[0.974,1.059] | 1.016<br>[0.974,1.060] | 1.071<br>[1.027,1.117] |
| Hospitality                    | 1.084<br>[1.006,1.168] | 1.081<br>[1.003,1.165] | 1.033<br>[0.959,1.114] |
| Manual                         | 0.993<br>[0.951,1.036] | 0.995<br>[0.953,1.039] | 0.947<br>[0.907,0.990] |
| Other workers-non-office based | 0.991<br>[0.952,1.032] | 0.994<br>[0.955,1.036] | 0.982<br>[0.943,1.023] |
| Other workers-office based     | 1<br>[1,1]             | 1<br>[1,1]             | 1<br>[1,1]             |
| Personal care                  | 1.155<br>[1.011,1.319] | 1.150<br>[1.006,1.313] | 1.076<br>[0.942,1.229] |
| Police and protective services | 1.101<br>[1.025,1.182] | 1.113<br>[1.036,1.196] | 1.098<br>[1.022,1.179] |
| Retail                         | 0.991<br>[0.937,1.048] | 0.992<br>[0.938,1.049] | 0.959<br>[0.906,1.014] |
| Sanitation services            | 1.032<br>[0.934,1.141] | 1.031<br>[0.933,1.140] | 0.986<br>[0.892,1.091] |
| Social care                    | 1.104<br>[1.048,1.162] | 1.100<br>[1.045,1.158] | 1.111<br>[1.055,1.169] |
| Transport-nonpublic facing     | 1.057<br>[0.980,1.139] | 1.058<br>[0.981,1.140] | 1.007<br>[0.934,1.086] |
| Transport-public facing        | 1.121<br>[1.001,1.256] | 1.116<br>[0.996,1.250] | 1.082<br>[0.966,1.213] |



|                     |                        |                        |                        |
|---------------------|------------------------|------------------------|------------------------|
| Not working/student | 0.939<br>[0.916,0.962] | 0.939<br>[0.916,0.963] | 0.906<br>[0.884,0.929] |
| Missing/incomplete  | 0.887<br>[0.866,0.909] | 0.886<br>[0.865,0.908] | 0.881<br>[0.860,0.903] |

**Supplementary Table 7: Hazard ratios (95% CIs) corresponding to occupational group in relation to infection with SARS-CoV-2. Based on n = 256,598 individuals. Model 1: Adjusted for age and sex. Model 2: Additionally adjusted for ethnicity, deprivation, region, urban or rural area, household size, and presence of pre-existing health conditions. Model 3: Additionally adjusted for number of vaccines received.**

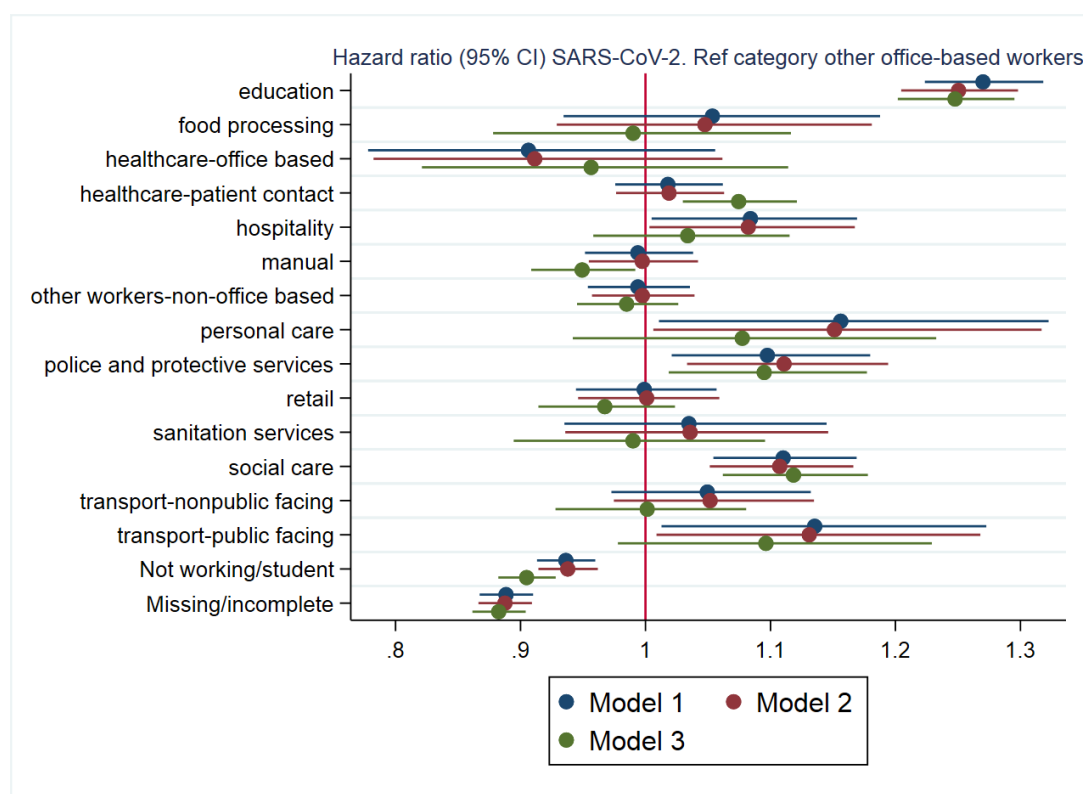

**Supplementary Figure 1: Sensitivity analysis, where a 6-month gap and negative PCR test is required between positive tests to register a new infection. Hazard ratios (95% CIs) corresponding to occupational group in relation to infection with SARS-CoV-2. Based on n = 256,598 individuals. Model 1: Adjusted for age and sex. Model 2: Additionally adjusted for ethnicity, deprivation, region, urban or rural area, household size, and presence of pre-existing health conditions. Model 3: Additionally adjusted for number of vaccines received.**

|                                | Model 1                | Model 2                | Model 3                |
|--------------------------------|------------------------|------------------------|------------------------|
| education                      | 1.270<br>[1.224,1.318] | 1.250<br>[1.205,1.298] | 1.248<br>[1.202,1.295] |
| food processing                | 1.054<br>[0.934,1.188] | 1.047<br>[0.929,1.181] | 0.990<br>[0.878,1.116] |
| healthcare-office based        | 0.906<br>[0.778,1.056] | 0.911<br>[0.782,1.062] | 0.956<br>[0.821,1.114] |
| healthcare-patient contact     | 1.018<br>[0.976,1.062] | 1.019<br>[0.977,1.063] | 1.075<br>[1.030,1.121] |
| hospitality                    | 1.084<br>[1.005,1.169] | 1.082<br>[1.003,1.168] | 1.034<br>[0.958,1.115] |
| manual                         | 0.994<br>[0.952,1.038] | 0.997<br>[0.955,1.042] | 0.949<br>[0.909,0.992] |
| other workers-non-office based | 0.994<br>[0.954,1.036] | 0.997<br>[0.957,1.039] | 0.985<br>[0.945,1.026] |
| other workers-office based     | 1<br>[1,1]             | 1<br>[1,1]             | 1<br>[1,1]             |
| personal care                  | 1.156<br>[1.011,1.323] | 1.151<br>[1.006,1.317] | 1.077<br>[0.942,1.233] |
| police and protective services | 1.098<br>[1.021,1.180] | 1.111<br>[1.033,1.194] | 1.095<br>[1.019,1.177] |
| retail                         | 0.999<br>[0.944,1.057] | 1.001<br>[0.946,1.059] | 0.967<br>[0.914,1.024] |
| sanitation services            | 1.035<br>[0.935,1.145] | 1.036<br>[0.936,1.146] | 0.990<br>[0.895,1.096] |
| social care                    | 1.110<br>[1.054,1.169] | 1.107<br>[1.051,1.166] | 1.118<br>[1.062,1.178] |
| transport-nonpublic facing     | 1.049<br>[0.973,1.132] | 1.052<br>[0.975,1.135] | 1.001<br>[0.928,1.081] |
| transport-public facing        | 1.135<br>[1.013,1.273] | 1.131<br>[1.009,1.268] | 1.096<br>[0.978,1.229] |
| Not                            | 0.936                  | 0.938                  | 0.905                  |

|                    |                        |                        |                        |
|--------------------|------------------------|------------------------|------------------------|
| working/student    | [0.913,0.960]          | [0.914,0.962]          | [0.882,0.928]          |
| Missing/incomplete | 0.888<br>[0.867,0.910] | 0.887<br>[0.866,0.909] | 0.883<br>[0.862,0.904] |

**Supplementary Table 8: Sensitivity analysis, where a 6-month gap and negative PCR test is required between positive tests to register a new infection. Hazard ratios (95% CIs) corresponding to occupational group in relation to infection with SARS-CoV-2. Based on n = 256,598 individuals. Model 1: Adjusted for age and sex. Model 2: Additionally adjusted for ethnicity, deprivation, region, urban or rural area, household size, and presence of pre-existing health conditions. Model 3: Additionally adjusted for number of vaccines received.**
